# Supplementary material for: Climate change stimulates the growth of the intertidal macroalgae Ascophyllum nodosum near the northern distribution limit
Source: Springer Nature journal article supplement (doi:10.1007/s13280-016-0873-7), 2017-01-23
Supplement: MOESM1 [file 15654750]

*Ambio*

Electronic Supplementary Material

*This supplementary material has not been peer reviewed*

Title: Climate change stimulates the growth of the intertidal macroalgae *Ascophyllum nodosum* near the northern distribution limit

Authors: Núria Marbà, Dorte Krause-Jensen, Birgit Olesen, Peter B. Christensen, Anissa Merzouk, Joao Rodrigues, Susse Wegeberg, Robert T. Wilce

**Table S1** Regression equations of temporal trends, for the entire time series and for the period since 1990, of annual mean air temperature, annual ice free days and *Ascophyllum nodosum* annual tip elongation rate at the study sites. The equations are of the form  $Y = a + (b \cdot X)$ . The p-value and the coefficient of determination are provided. The time periods of the series analysed are indicated.

| Y                                             | X           | site     | b    | SE <sub>b</sub> | a       | SE <sub>a</sub> | p-value | R <sup>2</sup> | time period |
|-----------------------------------------------|-------------|----------|------|-----------------|---------|-----------------|---------|----------------|-------------|
| mean annual air temperature (oC)              | time (year) | Tromsø   | 0.00 | 0.00            | -2.96   | 3.45            | 0.08    | 0.03           | 1921-2015   |
|                                               |             | Tromsø   | 0.01 | 0.01            | -10.92  | 23.96           | 0.56    | 0.02           | 1990-2012   |
|                                               |             | Lofoten  | 0.01 | 0.00            | -20.44  | 3.21            | <.0001  | 0.26           | 1900-2015   |
|                                               |             | Lofoten  | 0.02 | 0.01            | -33.14  | 24.79           | 0.19    | 0.08           | 1990-2012   |
|                                               |             | Aasiaat  | 0.03 | 0.01            | -63.98  | 24.15           | 0.02    | 0.10           | 1953-2012   |
|                                               |             | Aasiaat  | 0.25 | 0.02            | -505.86 | 42.63           | <.0001  | 0.87           | 1990-2012   |
|                                               |             | Sisimiut | 0.04 | 0.01            | -84.12  | 24.02           | 0.00    | 0.18           | 1961-2012   |
|                                               |             | Sisimiut | 0.23 | 0.02            | -462.28 | 44.03           | <.0001  | 0.84           | 1990-2012   |
|                                               |             | Nuuk     | 0.00 | 0.01            | -11.03  | 15.87           | 0.54    | 0.01           | 1953-2012   |
|                                               |             | Nuuk     | 0.13 | 0.02            | -256.08 | 42.40           | <.0001  | 0.63           | 1990-2012   |
| annual ice-free days (days yr <sup>-1</sup> ) | time (year) | Tromsø   | -    | -               | -       | -               | -       | -              | 1990-2009   |
|                                               |             | Lofoten  | -    | -               | -       | -               | -       | -              | 1990-2009   |

|                                       |                                           |              |      |      |           |         |        |      |           |
|---------------------------------------|-------------------------------------------|--------------|------|------|-----------|---------|--------|------|-----------|
|                                       |                                           | Qeqertarsuaq | 9.12 | 1.54 | -18055.37 | 3083.33 | <.0001 | 0.66 | 1990-2009 |
|                                       |                                           | Sisimiut     | 8.15 | 0.90 | -16023.95 | 1791.25 | <.0001 | 0.82 | 1990-2009 |
|                                       |                                           | Nuuk         | 2.56 | 0.71 | -4773.49  | 1422.16 | 0.00   | 0.42 | 1990-2009 |
| annual tip<br>elongation (cm yr-1)    | time (year)                               | Tromsø       | 0.09 | 0.06 | -175.79   | 118.84  | 0.18   | 0.28 | 2002-2009 |
|                                       |                                           | Lofoten      | 0.24 | 0.03 | -482.06   | 54.26   | <.0001 | 0.88 | 1997-2009 |
|                                       |                                           | Kronprinsens | 0.09 | 0.02 | -169.95   | 31.06   | <.0001 | 0.67 | 1995-2011 |
|                                       |                                           | Kronprinsens | 0.03 | 0.01 | -54.78    | 11.82   | 0.00   | 0.56 | 1958-2011 |
|                                       |                                           | Qeqertarsuaq | 0.00 | 0.04 | -4.99     | 79.53   | 0.92   | 0.00 | 1997-2008 |
|                                       |                                           | Sisimiut     | 0.01 | 0.03 | -22.86    | 52.28   | 0.63   | 0.04 | 2000-2008 |
|                                       |                                           | Kobbe Inner  | 0.00 | 0.04 | -0.94     | 72.56   | 0.93   | 0.00 | 1997-2009 |
|                                       |                                           | Kobbe Mid    | 0.17 | 0.06 | -343.55   | 119.77  | 0.01   | 0.44 | 1997-2009 |
|                                       |                                           |              |      |      |           |         |        |      |           |
| annual tip<br>elongation (cm<br>yr-1) | mean annual<br>air<br>temperature<br>(oC) | Tromsø       | 0.49 | 0.44 | 4.33      | 1.61    | 0.32   | 0.17 | 2002-2009 |
|                                       |                                           | Lofoten      | 2.02 | 0.50 | 4.12      | 0.30    | 0.00   | 0.60 | 1997-2009 |
|                                       |                                           | Kronprinsens | 0.40 | 0.10 | 4.23      | 0.32    | 0.00   | 0.50 | 1995-2011 |
|                                       |                                           | Kronprinsens | 0.28 | 0.07 | 3.88      | 0.27    | 0.00   | 0.44 | 1958-2011 |
|                                       |                                           | Qeqertarsuaq | 0.44 | 0.18 | 4.28      | 0.55    | 0.04   | 0.41 | 1997-2008 |

|                                    |                                         |              |       |       |        |      |      |      |           |
|------------------------------------|-----------------------------------------|--------------|-------|-------|--------|------|------|------|-----------|
|                                    |                                         | Sisimiut     | -0.05 | 0.12  | 3.56   | 0.20 | 0.70 | 0.02 | 2000-2008 |
|                                    |                                         | Kobbe Inner  | -0.55 | 0.23  | 5.21   | 0.15 | 0.04 | 0.34 | 1997-2009 |
|                                    |                                         | Kobbe Mid    | 0.83  | 0.57  | 7.35   | 0.38 | 0.18 | 0.16 | 1997-2009 |
| annual tip<br>elongation (cm yr-1) | annual ice-<br>free days<br>(days yr-1) | Tromsø       | -     | -     | -      | -    | -    | -    | 2002-2009 |
|                                    |                                         | Lofoten      | -     | -     | -      | -    | -    | -    | 1997-2009 |
|                                    |                                         | Kronprinsens | 0.003 | 0.002 | 2.32   | 0.34 | 0.07 | 0.23 | 1995-2011 |
|                                    |                                         | Qeqertarsuaq | 0.000 | 0.002 | 3.05   | 0.48 | 0.88 | 0.00 | 1997-2008 |
|                                    |                                         | Sisimiut     | 0.001 | 0.002 | 3.44   | 0.55 | 0.72 | 0.02 | 2000-2008 |
|                                    |                                         | Kobbe Inner  | 0.002 | 0.016 | 0.91   | 5.54 | 0.92 | 0.00 | 1997-2009 |
|                                    |                                         | Kobbe Mid    | 0.082 | 0.024 | -21.84 | 8.57 | 0.01 | 0.51 | 1997-2009 |

---

**Table S2** Coefficients (and standard error of the coefficients), significance (p-value) and coefficient of determination ( $R^2$ ) of the models fit between annual air temperature, annual ice-free days or *Ascophyllum nodosum* growth and time (years, period 1990-2012) and latitude across all studied Arctic and subarctic populations. The model was  $Y = a_1 + b_1 \cdot \text{time} + a_2 \cdot \text{latitude} + b_2 (\text{time} \cdot \text{latitude})$ .

| Y                                                  | Term                              | coefficient | Std Error | p-value | $R^2$ |
|----------------------------------------------------|-----------------------------------|-------------|-----------|---------|-------|
| mean annual air temperature ( $^{\circ}\text{C}$ ) | intercept                         | -305.16     | 63.02     | <.0001  | 0.13  |
|                                                    | time                              | 0.15        | 0.03      | <.0001  |       |
|                                                    | latitude                          | 0.07        | 0.09      | 0.45    |       |
|                                                    | (latitude-67.3567)*(year-2000.73) | 0.00        | 0.01      | 0.80    |       |
| annual ice-free days (days yr $^{-1}$ )            | intercept                         | -8822.68    | 1885.24   | <.0001  | 0.52  |
|                                                    | time                              | 5.37        | 0.94      | <.0001  |       |
|                                                    | latitude                          | -24.38      | 2.62      | <.0001  |       |
|                                                    | (latitude-66.9587)*(year-1999.59) | 1.03        | 0.45      | 0.024   |       |
| annual tip elongation (cm yr $^{-1}$ )             | intercept                         | -213.87     | 67.30     | 0.002   | 0.47  |
|                                                    | time                              | 0.12        | 0.03      | 0.000   |       |
|                                                    | latitude                          | -0.45       | 0.06      | <.0001  |       |
|                                                    | (latitude-67.289)*(year-2003.27)  | 0.02        | 0.02      | 0.24    |       |
